# Supplementary material
Source: HighWire-hosted journal article supplement (https://gh.bmj.com/highwire/filestream/156041/field_highwire_adjunct_files/0/812103figa.pdf)

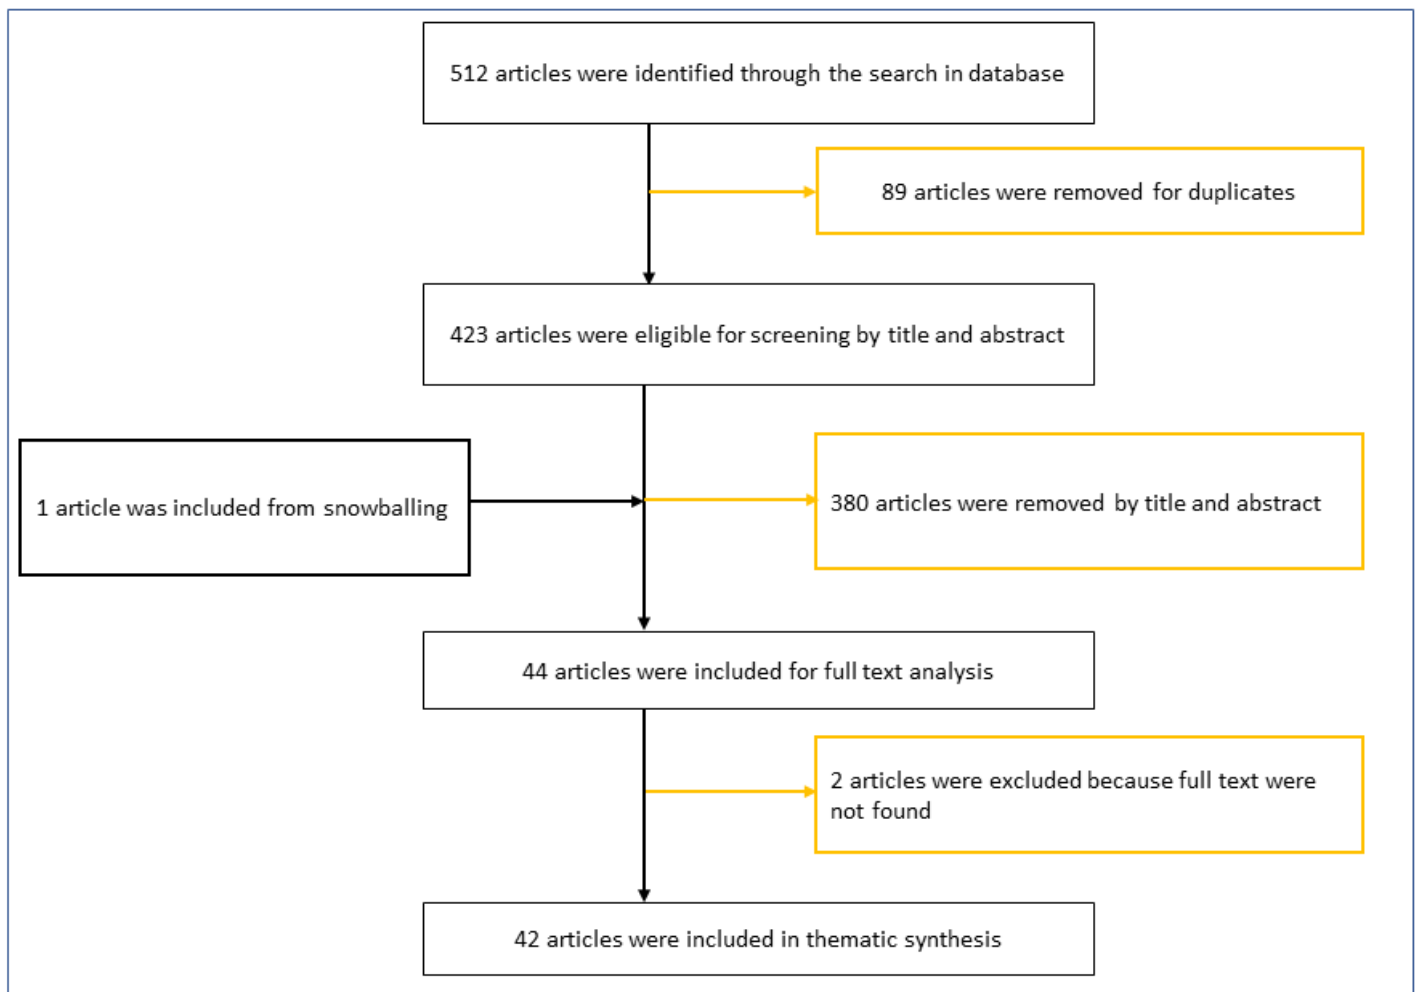

Supplement: 812103figa.pdf [file 812103figa.pdf]
